# Supplementary material
Source: Springer Nature journal article supplement (https://www.springermedizin.de/resource/supplementary/12889_2005_271_MOESM3_ESM.pdf/9500500)

# Males

# Females

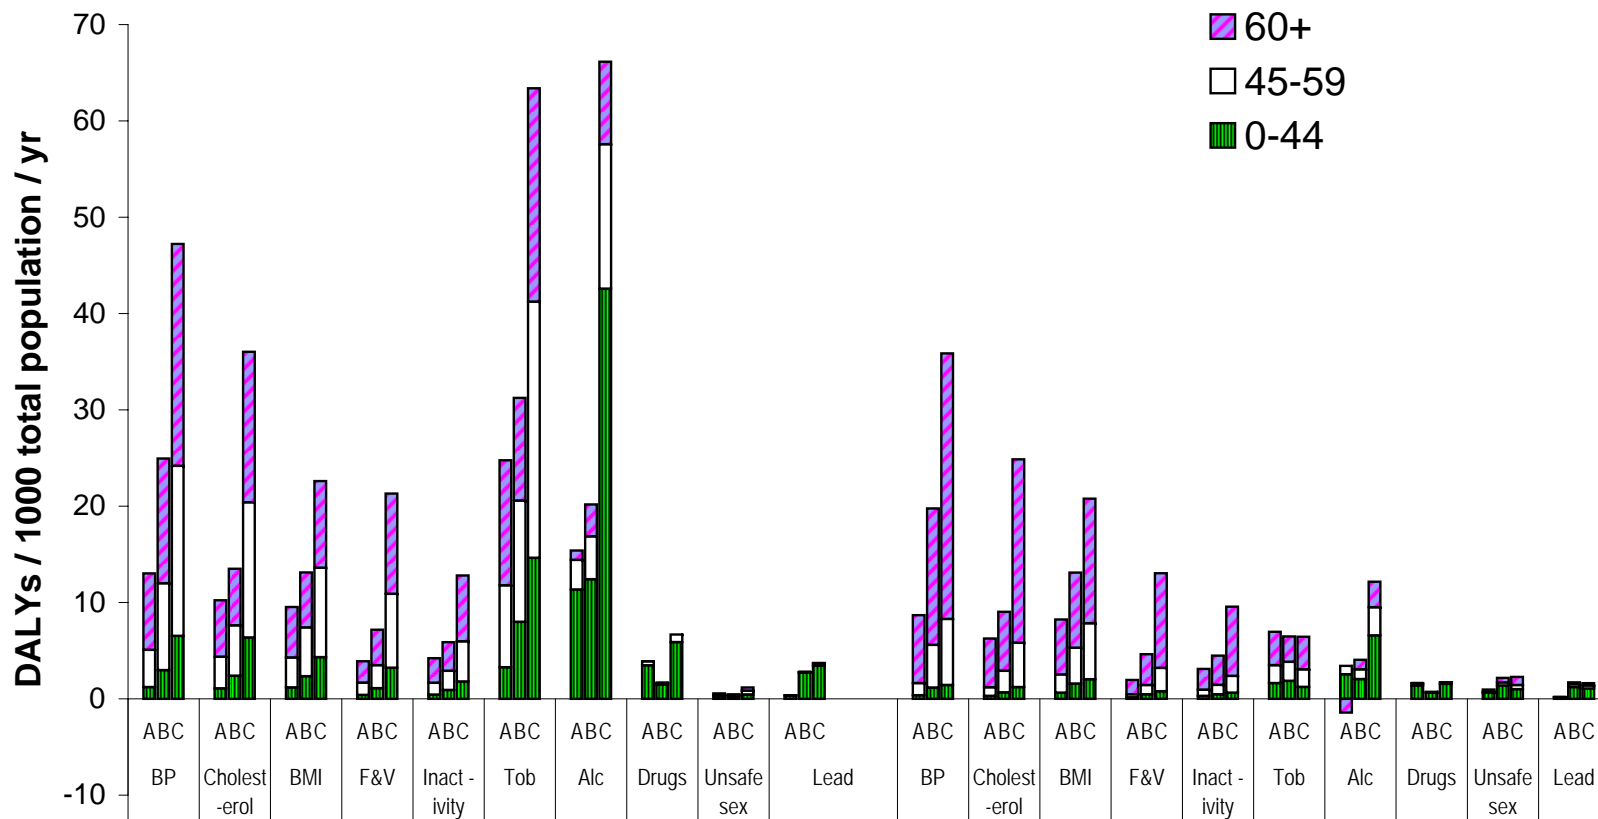

Supplement: MOESM3 [file 9500500]
